# Supplementary material for: Thin carbon layer covered Co4N cubes encapsulated in N-doped porous carbon nanocage as tri-functional catalysts with enhanced charge-transfer efficiency for Zn-air battery and overall water-splitting
Source: Royal Society of Chemistry journal article supplement (doi:10.1039/d3ta01509b), 2023-01-01
Supplement: d3ta01509b1.pdf [file d3ta01509b1.pdf]

## Supporting Information

### Thin carbon layer covered Co<sub>4</sub>N cubes encapsulated in N-doped porous carbon nanocages as tri-functional catalysts with enhanced charge-transfer efficiency for Zn-air battery and overall water-splitting

*Guanghai Zhang<sup>a</sup>, Lingxue Zhao<sup>a</sup>, Guangda Li<sup>\*a</sup>, Liqiang Xu<sup>\*b</sup>*

<sup>a</sup>School of Materials Science and Engineering, Qilu University of Technology (Shandong Academy of Sciences), Jinan 250353, China

<sup>b</sup> Key Laboratory of Colloid and Interface Chemistry, Ministry of Education, School of Chemistry and Chemical Engineering, Shandong University, Jinan 250100, China

### Experimental Section

#### Synthesis of Co<sub>4</sub>N/C

0.1 g Co(OH)<sub>2</sub> and 5 mL above mixed solution were added into 25 mL of deionized water and stirred for 24 h. The obtained product Co<sub>3</sub>[Co(CN)<sub>6</sub>]<sub>2</sub>/C-1 was washed with deionized water for several times, and dried at 60 °C for 3 h. Finally, 0.1 g Co<sub>3</sub>[Co(CN)<sub>6</sub>]<sub>2</sub>/C was annealed at 700 °C for 2 h with a heating rate of 5 °C min<sup>-1</sup> under N<sub>2</sub> atmosphere to obtain Co<sub>4</sub>N/C.

#### Synthesis of CoNC

0.1 g Co(OH)<sub>2</sub>, 0.1 mmol citric acid and 0.2 mmol K<sub>3</sub>[Co(CN)<sub>6</sub>] were added into 25 mL of deionized water and stirred for 24 h. The obtained product Co<sub>3</sub>[Co(CN)<sub>6</sub>]<sub>2</sub> was washed with deionized water for several times, and dried at 60 °C for 3 h. Finally, 0.1 g Co<sub>3</sub>[Co(CN)<sub>6</sub>]<sub>2</sub> was annealed at 700 °C for 2 h with a heating rate of 5 °C min<sup>-1</sup> under N<sub>2</sub> atmosphere to obtain CoNC.

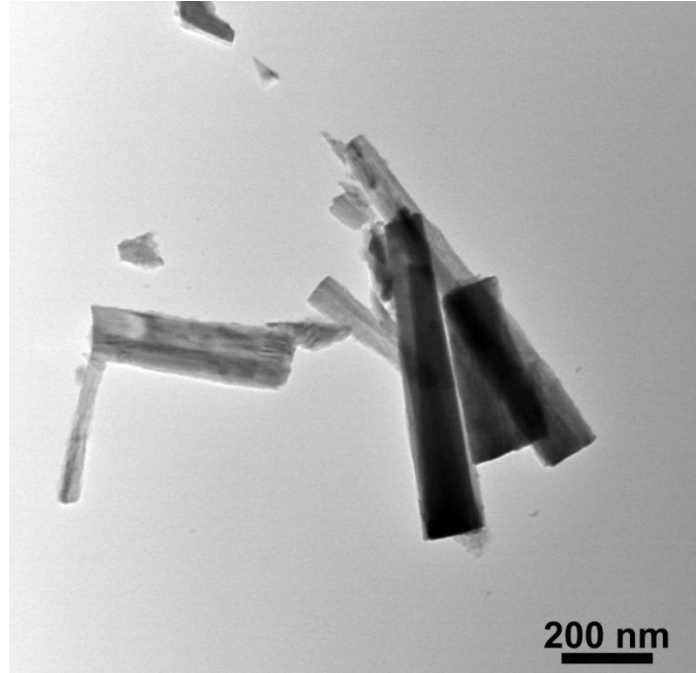

Fig. S1 A typical TEM image of the obtained  $\text{Co(OH)}_2$ .

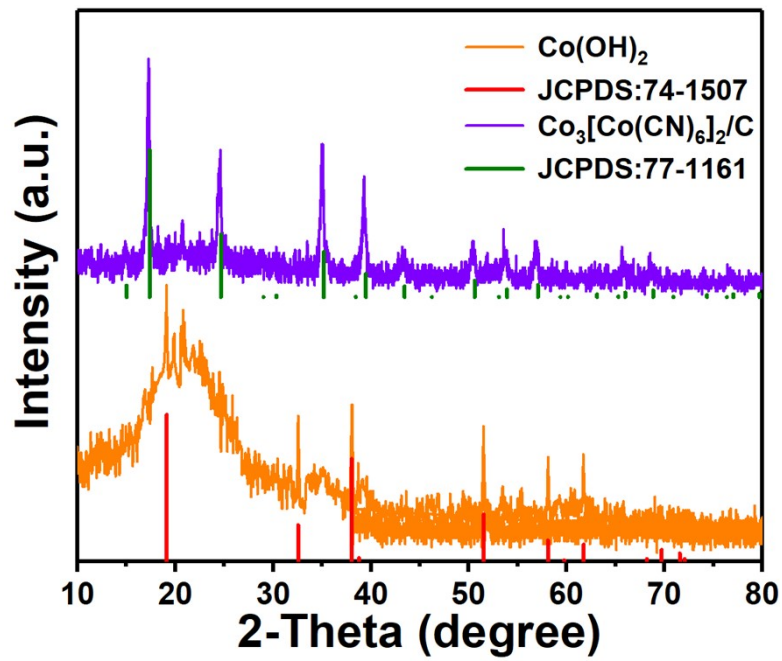

Fig. S2 XRD patterns of  $\text{Co(OH)}_2$  and  $\text{Co}_3[\text{Co(CN)}_6]_2/\text{C}$ .

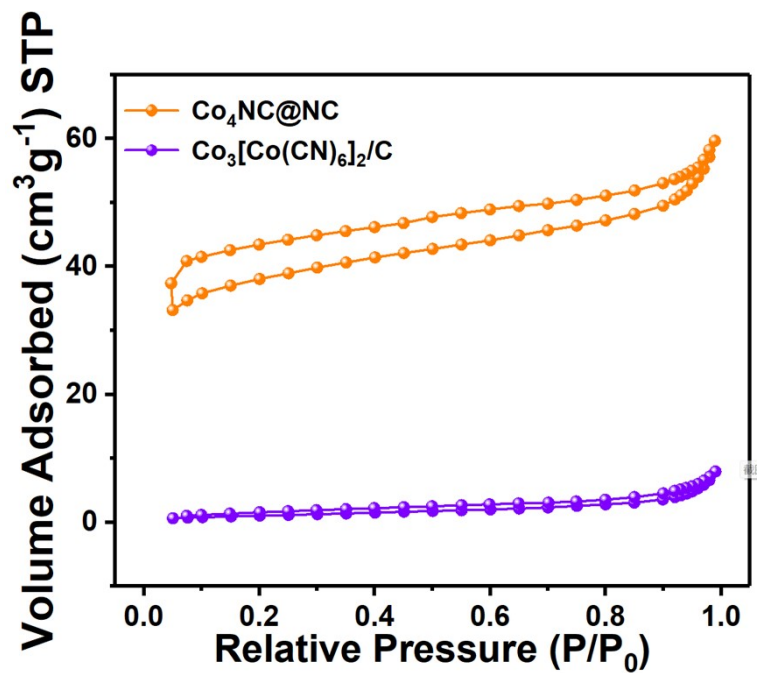

Fig. S3 The N<sub>2</sub> adsorption isotherm of the Co<sub>4</sub>NC@NC and Co<sub>3</sub>[Co(CN)<sub>6</sub>]<sub>2</sub>/C.

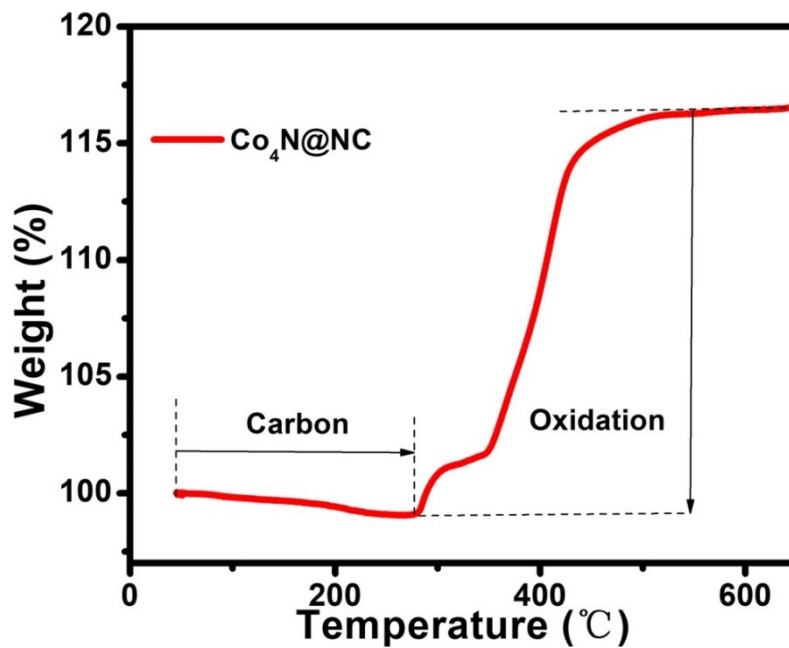

Fig. S4 TGA curve of the Co<sub>4</sub>NC@NC.

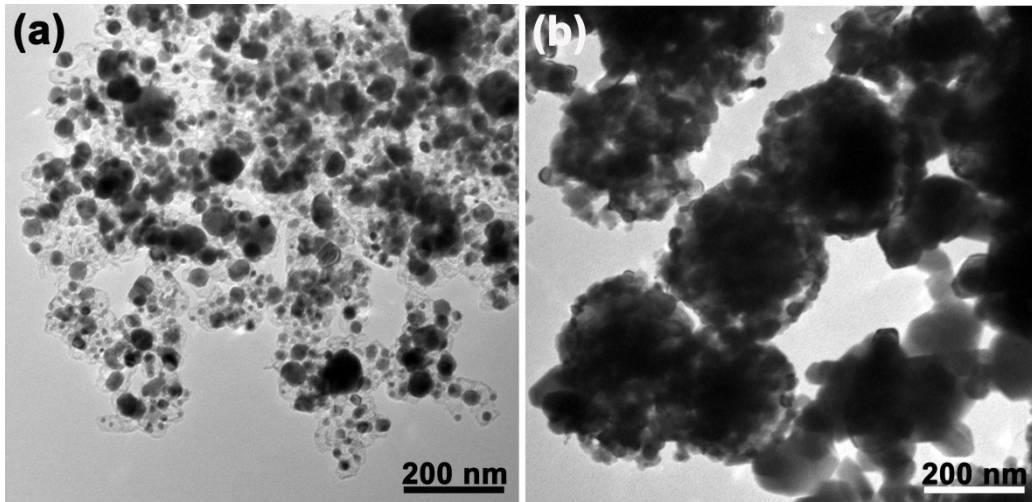

Fig. S5 TEM images of  $\text{Co}_4\text{N}/\text{C}$  and  $\text{CoNC}$  for (a) and (b).

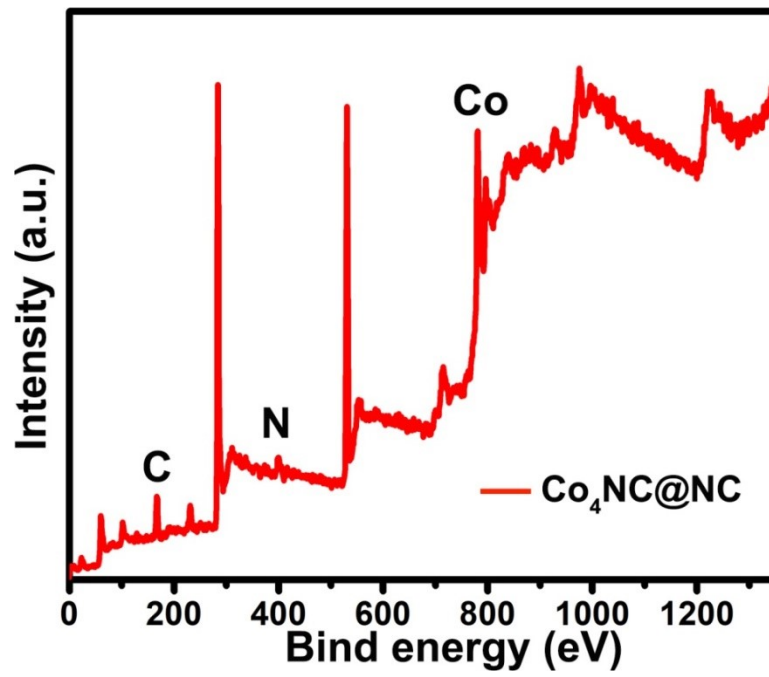

Fig. S6 Survey spectrum of the  $\text{Co}_4\text{NC@NC}$ .

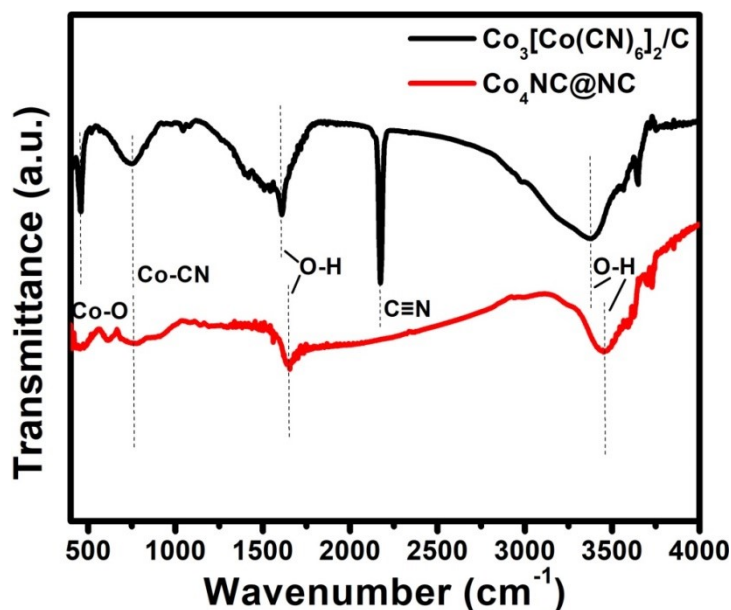

Fig. S7 FTIR spectra of  $\text{Co}_4\text{NC@NC}$  and  $\text{Co}_3[\text{Co}(\text{CN})_6]_2/\text{C}$ .

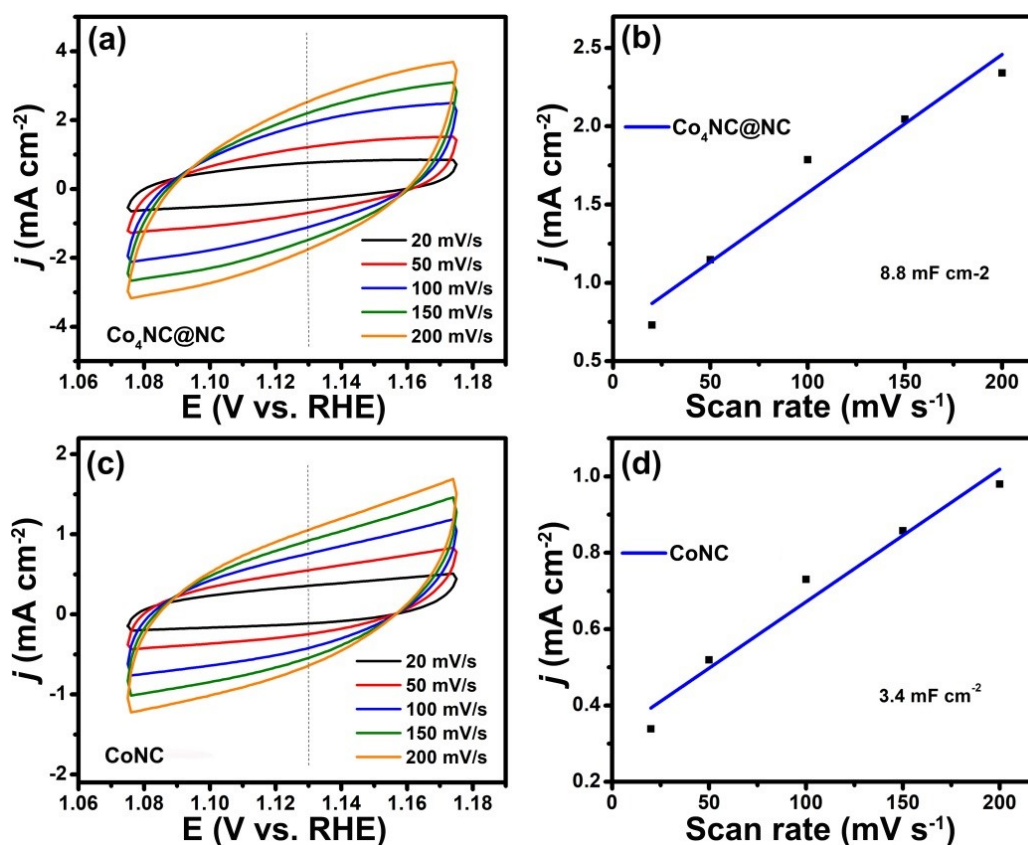

Fig. S8 (a) CV curves of  $\text{Co}_4\text{NC@NC}$  measured in a potential window with a non-Faradaic region at different scan rates: 20, 50, 100, 150 and 200  $\text{mV s}^{-1}$ . (b) ECSA curve of the  $\text{Co}_4\text{NC@NC}$  material. (c) CVs of  $\text{CoNC}$  was measured in a potential window with a non-Faradaic region at different scan rates: 20, 50, 100, 150 and 200  $\text{mV s}^{-1}$ . (d) ECSA was measured to evaluate the exposed catalytically active sites in  $\text{CoNC}$  material.

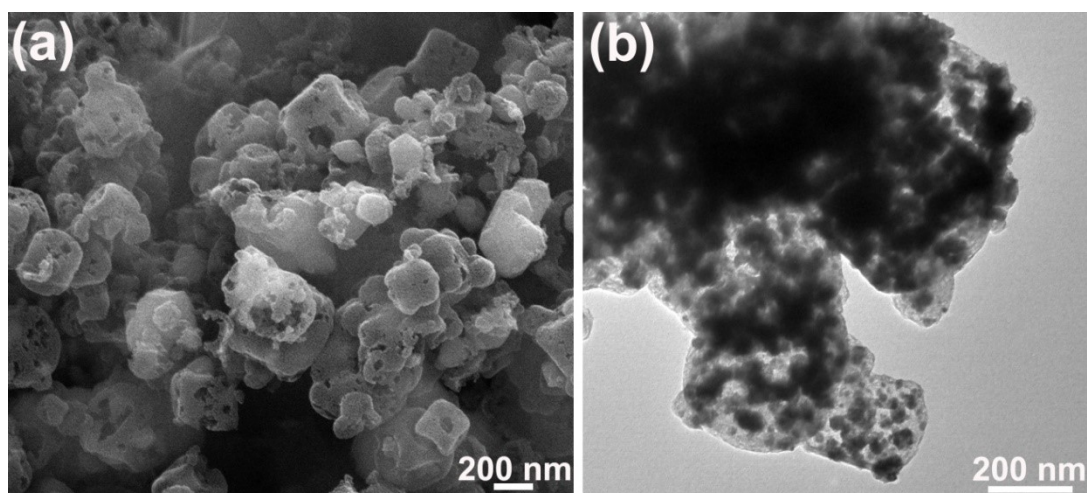

Fig. S9 SEM and TEM images of  $\text{Co}_4\text{NC}@ \text{NC}$  after 10000 s of OER test.

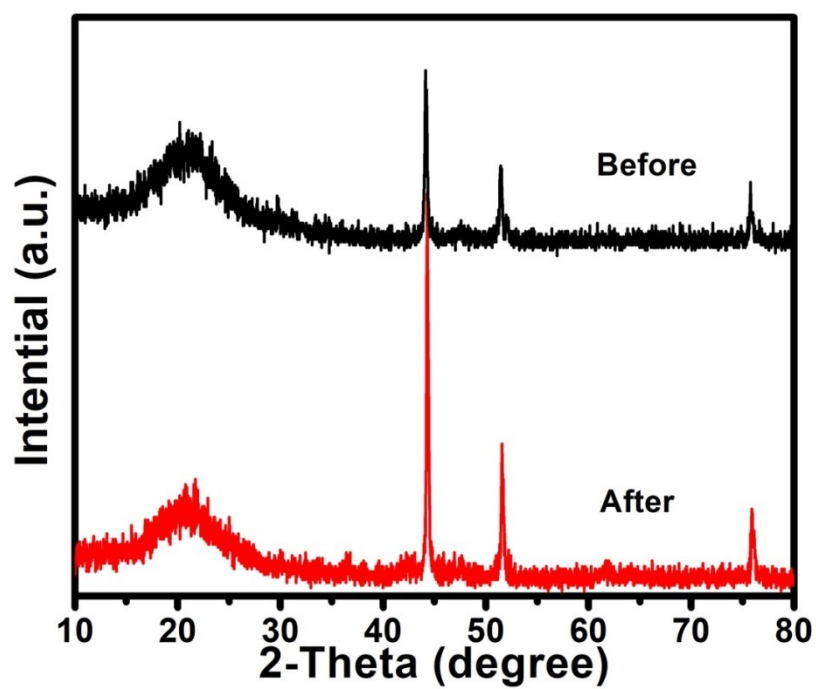

Fig. S10 XRD patterns of the obtained  $\text{Co}_4\text{NC}@ \text{NC}$  before and after 10000 s of OER test.

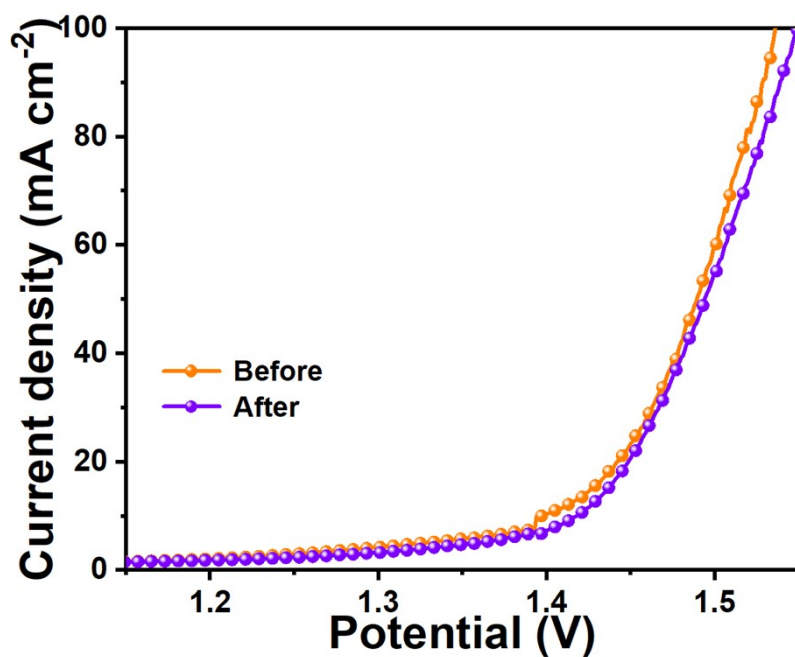

Fig. 11 The LSV of the Co<sub>4</sub>NC@NC before and after the 10000 s of OER test.

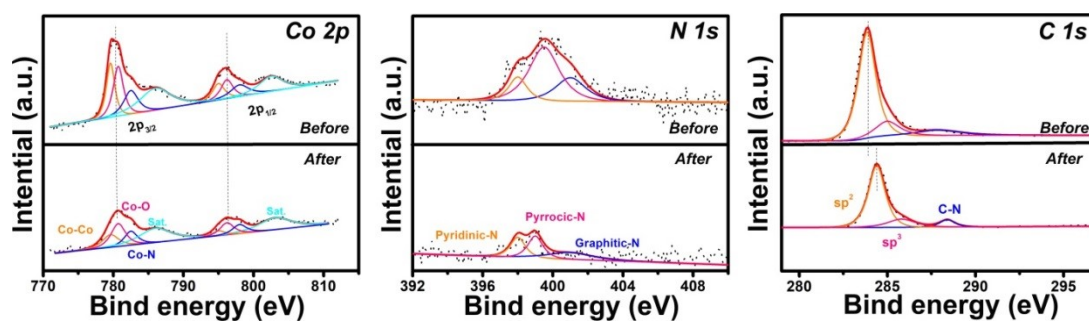

Fig. S12 XPS spectra of the Co 2p, N 1s and C 1s for Co<sub>4</sub>NC@NC before and after 10000 s of OER test.



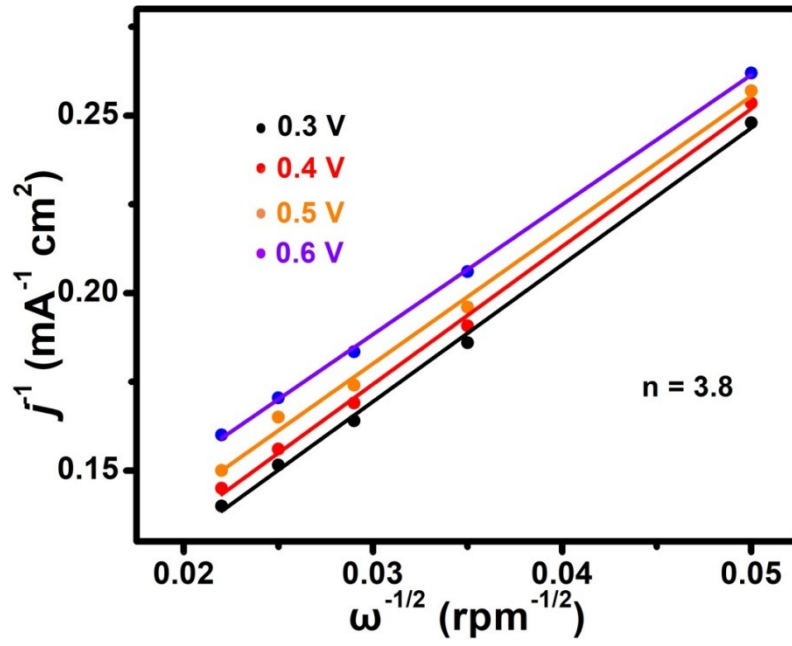

Fig. S13 K-L plots of the  $\text{Co}_4\text{NC}@NC$  catalysts.

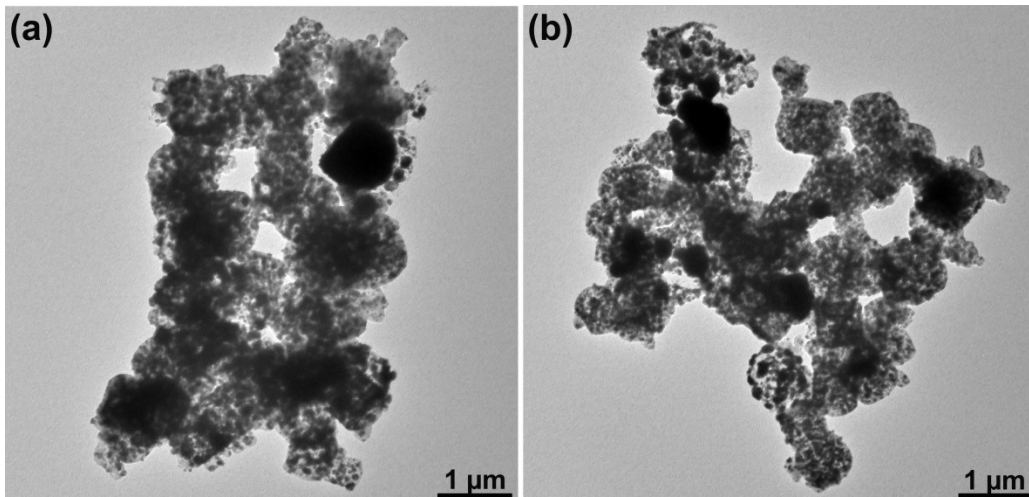

Fig. 14 The TEM of  $\text{Co}_4\text{NC}@NC$  before and after charging and discharging test.



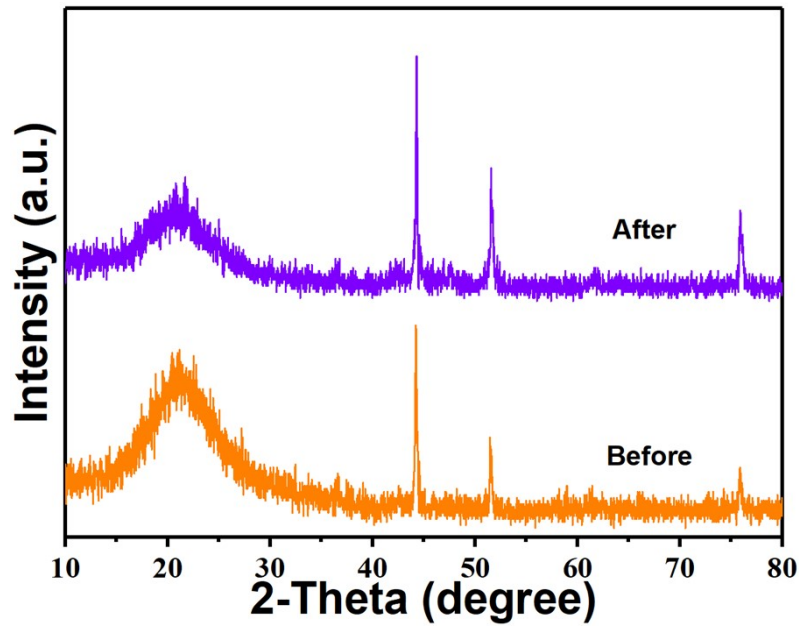

Fig. 15 The XRD of Co<sub>4</sub>NC@NC before and after charging and discharging test.

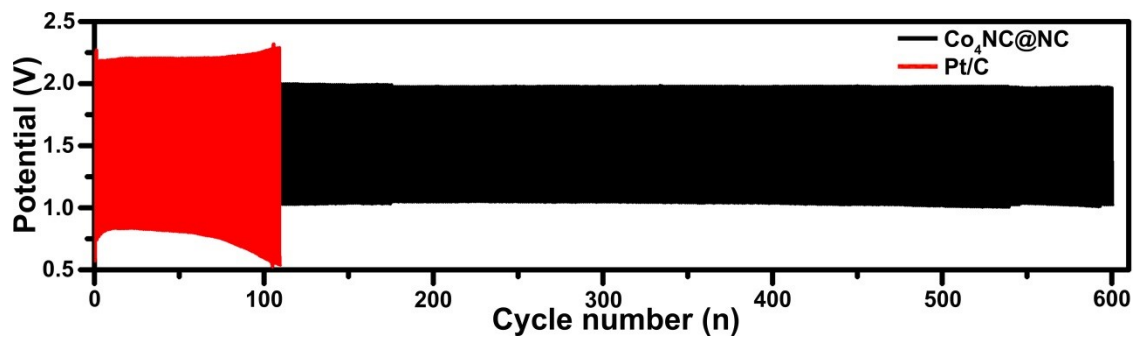

Fig. S16 Cycling stability of Co<sub>4</sub>NC@NC and Pt/C at discharge/charge current densities of 10.0 mA cm<sup>-2</sup>.

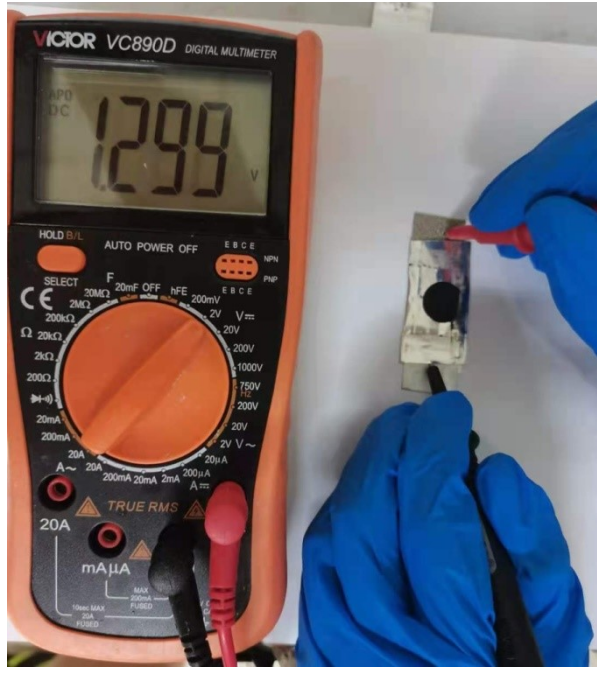

**Fig. S17** Flexible soft-pack ZABs of open-circuit voltage.

**Table S1** The battery performance comparisons of the present with previously reported similar materials.

| <b>Catalysts</b>                                | <b>Cycling condition</b>                        | <b>Stability</b> | <b>Flexible</b> | <b>Ref.</b>                                   |
|-------------------------------------------------|-------------------------------------------------|------------------|-----------------|-----------------------------------------------|
| <b>Co/ZnCo<sub>2</sub>O<sub>4</sub>@NC-CNTs</b> | 5 mA cm <sup>-2</sup>                           | 103 h            | Yes             | Nano Energy 82 (2021) 105710.                 |
| <b>Co-N-C</b>                                   | 2 mA cm <sup>-2</sup>                           | 140 h            | No              | Small 16 (2020) 2001171                       |
| <b>P-CoO@PWC-2</b>                              | 10 mA cm <sup>-2</sup>                          | 232 h            | Yes             | Adv. Sci. (2021) 2101314                      |
| <b>Ni<sub>3</sub>Fe/Co-N-C</b>                  | 10 mA cm <sup>-2</sup>                          | 65 h             | No              | Chem. Eng. J. 395 (2020) 125151               |
| <b>Co-Fe-S@NSRPC</b>                            | 10 mA cm <sup>-2</sup>                          | 52 h             | No              | Nanoscale 12 (2020) 11746-11758               |
| <b>Co-MOF/LC-0.5</b>                            | 5 mA cm <sup>-2</sup>                           | 120 h            | No              | J. Power Sources 468 (2020) 228377            |
| <b>Co-MOF-800</b>                               | 1 mA cm <sup>-2</sup>                           | 85 h             | No              | Journal of Energy Chemistry 56 (2020) 290-298 |
| <b>KNiFe(CN)<sub>6</sub>/C</b>                  | 5 mA cm <sup>-2</sup>                           | 333 h            | Yes             | Electrochim. Acta 397 (2021) 139278           |
| <b>Co/CoFe@NC</b>                               | 5 mA cm <sup>-2</sup>                           | 183 h            | Yes             | Nano-Micro Lett. (2021) 13 126                |
| <b>Co<sub>4</sub>NC@NC</b>                      | 5 mA cm <sup>-2</sup><br>10 mA cm <sup>-2</sup> | 350 h<br>200 h   | Yes             | This Work                                     |
